# Supplementary material for: Direct determination of transition metals in mussel tissue digests using high-performance chelation ion chromatography with monolithic silica based chelating ion exchangers
Source: Royal Society of Chemistry journal article supplement (doi:10.1039/c3ay40301g), 2013-01-01

Figure S1. Overlaid HPCIC sample chromatograms showing standard addition of Cd(II) to mussel tissue digest sample using HEPMA chelating column.

Other conditions as in Figure 3(b).

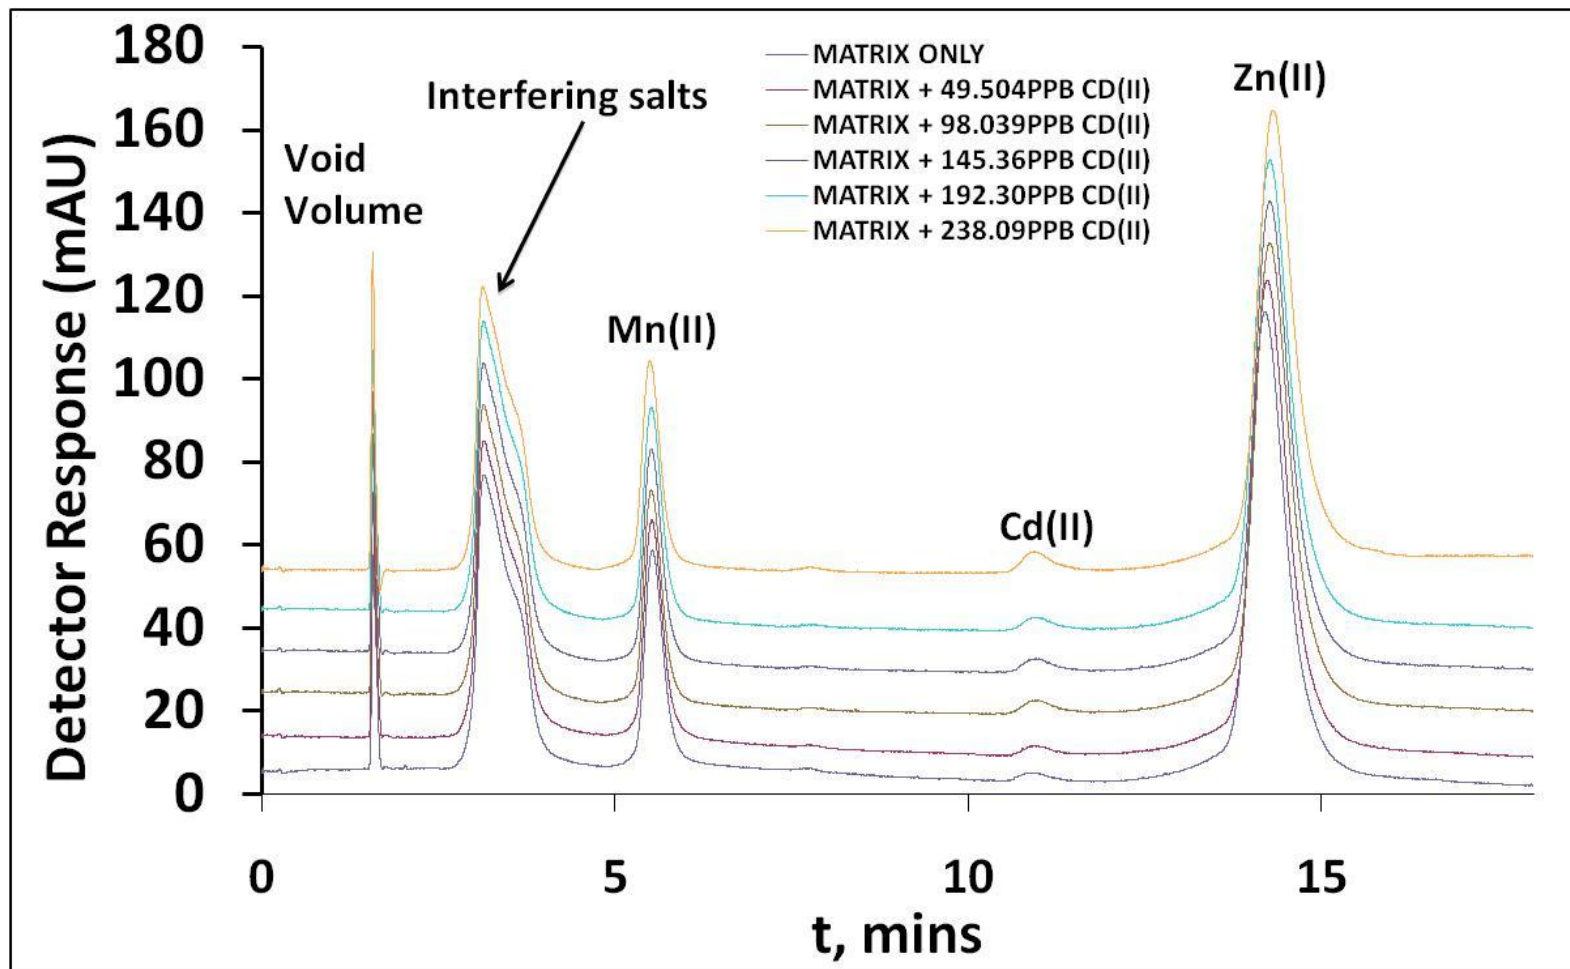

Supplement: c3ay40301g.pdf [file c3ay40301g.pdf]
